# Supplementary material for: Unveiling hidden ferrimagnetism and giant magnetoelectricity in polar magnet Fe2Mo3O8
Source: PubMed Central journal article supplement (PMC4508583; doi:10.1038/srep12268), 2015-07-21
Supplement: srep12268-s1.pdf [file srep12268-s1.pdf]

## Supplementary Information for

### Unveiling hidden ferrimagnetism and giant magnetoelectricity in polar magnet $\text{Fe}_2\text{Mo}_3\text{O}_8$

Yazhong Wang<sup>1</sup>, Gheorghe L. Pascut<sup>1</sup>, Bin Gao<sup>1</sup>, Trevor A. Tyson<sup>1,2</sup>, Kristjan Haule<sup>1</sup>, Valery Kiryukhin<sup>1</sup>, and Sang-Wook Cheong<sup>1,\*</sup>

<sup>1</sup>Rutgers Center for Emergent Materials and Department of Physics and Astronomy, Rutgers University, Piscataway, New Jersey 08854, USA

<sup>2</sup>Department of Physics, New Jersey Institute of Technology, Newark, New Jersey 07102, USA

\*Corresponding author, sangc@physics.rutgers.edu

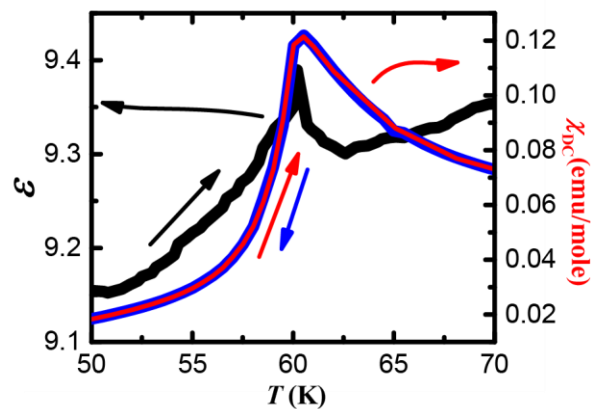

**Supplementary Figure 1| Dielectric  $\varepsilon(T)$  and magnetic  $\chi_{llc}(T)$  susceptibilities in the vicinity of  $T_N$ .** The magnetic susceptibility was measured on cooling in applied magnetic field  $H=0.2$  T (blue line), and on subsequent warming in the same field (red line).

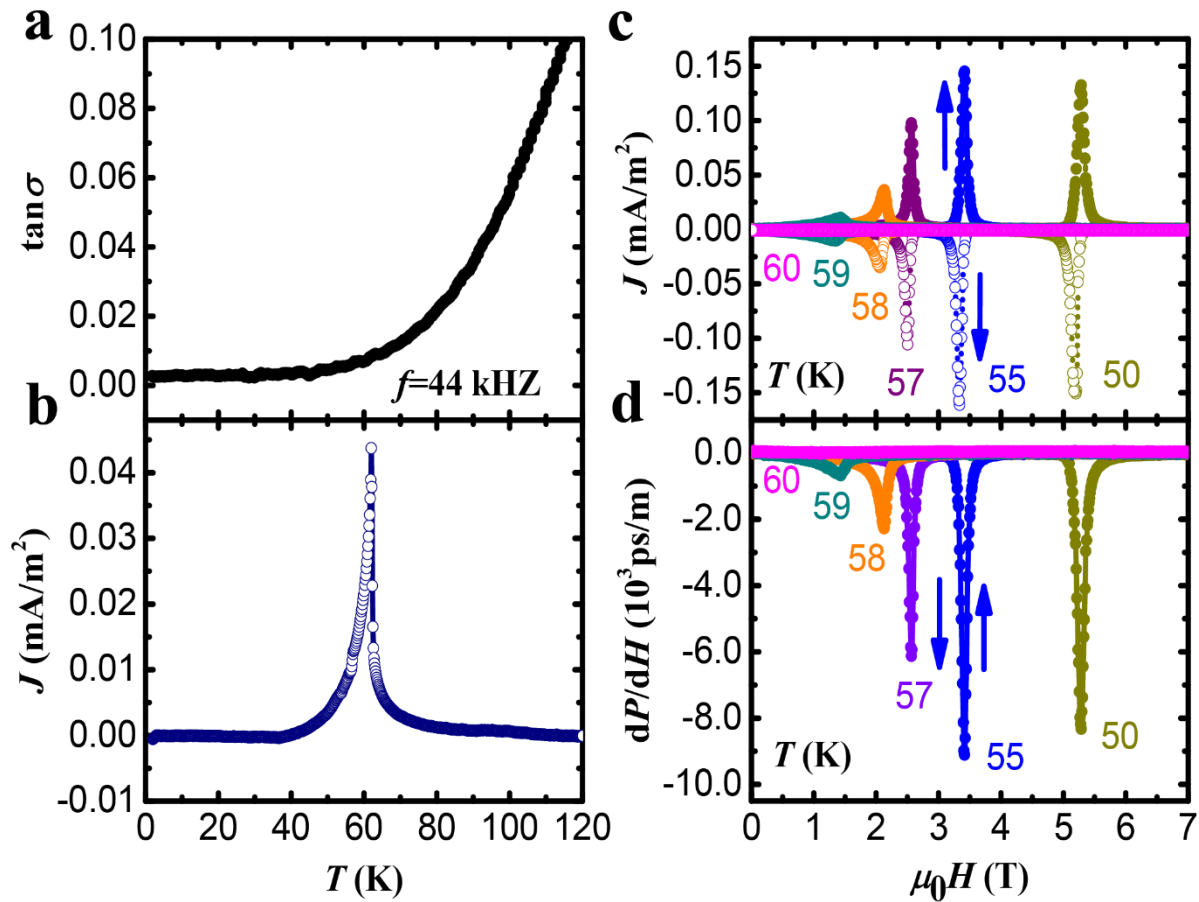

**Supplementary Figure 2| Pyroelectric current, magneto-current, and the differential ME coefficient  $dP/dH$  at different temperatures.** (a) Loss tangent as a function of temperature. (b) Pyroelectric current as a function of temperature, measured upon warming. (c) Isothermal magnetocurrent as a function of magnetic field. (d) Differential magnetolectric coefficient  $dP/dH$  calculated using the data shown in panel (c). Arrows indicate the field sweeping direction. All the measurements are along the crystallographic  $c$  axis.

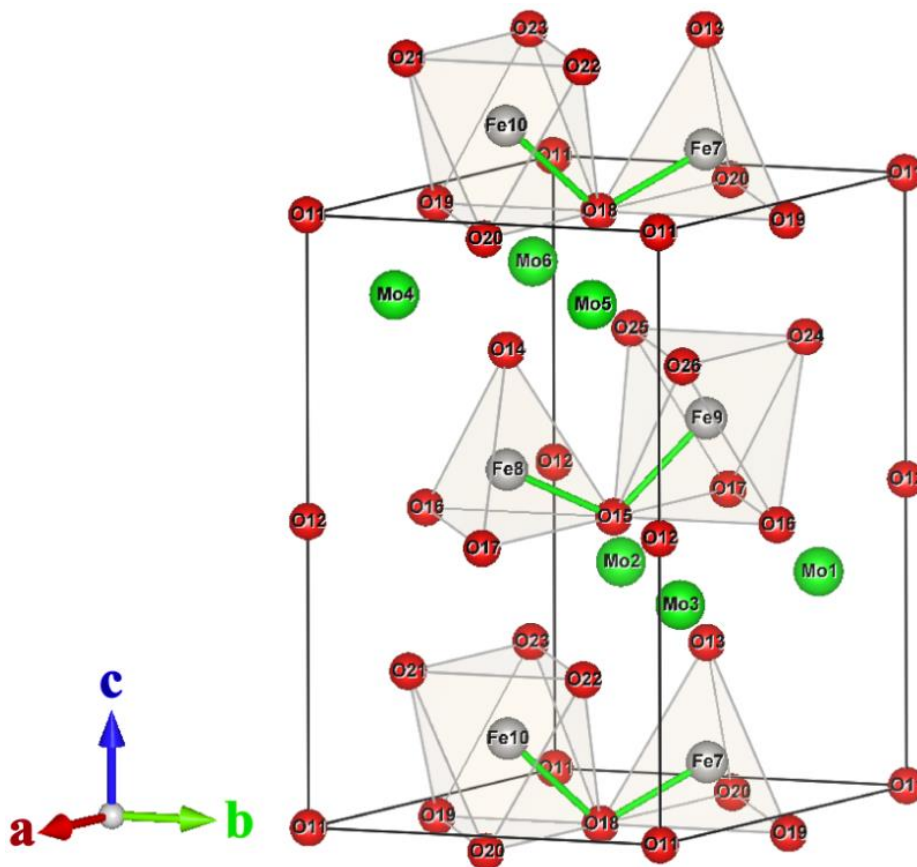

Supplementary Figure 3| Crystal structure of  $\text{Fe}_2\text{Mo}_3\text{O}_8$ , with ions labeled for Supplementary Table I below.

| Ionic shifts in Å |                                                 |                                                |
|-------------------|-------------------------------------------------|------------------------------------------------|
| Ion               | $10^3 \times (z_j^{AFM} - z_j^{PARA}) \times c$ | $10^3 \times (z_j^{FRM} - z_j^{AFM}) \times c$ |
| Mo1               | 2(2)                                            | 0(3)                                           |
| Mo2               | 8(2)                                            | -7(1)                                          |
| Mo3               | 8(2)                                            | -4(2)                                          |
| Mo4               | 2(2)                                            | 0(3)                                           |
| Mo5               | 8(2)                                            | -7(1)                                          |
| Mo6               | 8(2)                                            | -4(2)                                          |
| Fe7               | 10(2)                                           | -5(2)                                          |
| Fe8               | 10(2)                                           | -5(2)                                          |
| Fe9               | 5(2)                                            | 2(2)                                           |
| Fe10              | 5(2)                                            | 2(2)                                           |
| O11               | 10(2)                                           | -3(2)                                          |
| O12               | 10(2)                                           | -3(2)                                          |
| O13               | 11(2)                                           | -3.5(1.0)                                      |
| O14               | 11(2)                                           | -3.5(1.0)                                      |
| O15               | 47(10)                                          | -30(12)                                        |
| O16               | -14(2)                                          | 30(4)                                          |
| O17               | -14(2)                                          | 17(3)                                          |
| O18               | 47(10)                                          | -30(12)                                        |
| O19               | -14(2)                                          | 30(4)                                          |
| O20               | -14(2)                                          | 17(3)                                          |
| O21               | -30(3)                                          | 15(10)                                         |
| O22               | 6(2)                                            | -9(2)                                          |
| O23               | 6(2)                                            | -15(8)                                         |
| O24               | -30(3)                                          | 15(10)                                         |
| O25               | 6(2)                                            | -9(2)                                          |
| O26               | 6(2)                                            | -15(8)                                         |

**Supplementary Table I** | Calculated ionic shifts for the paramagnetic to AFM transition (2<sup>nd</sup> column), and for the AFM to FRM transition (3<sup>rd</sup> column). See Supplementary Fig 3 for atomic labeling. Error bars reflect the impact of the multiple low-energy solutions characteristic to the GGA-PBE+U method.

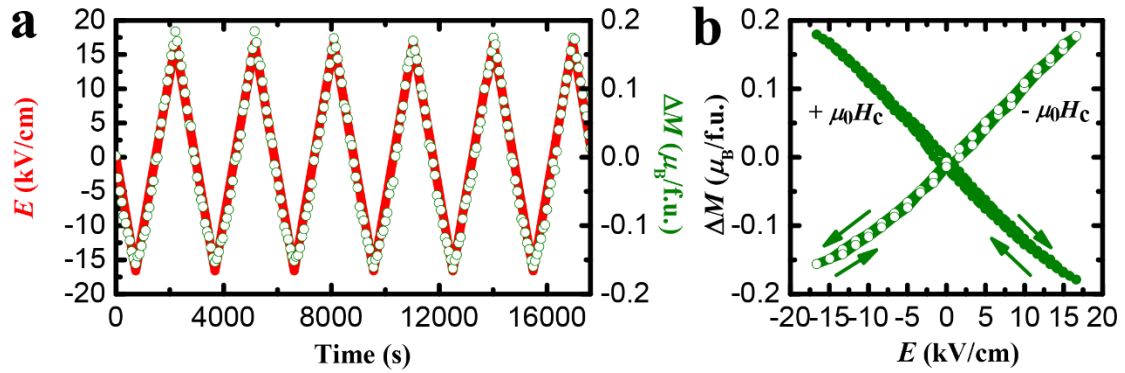

**Supplementary Figure 4 | Reversal of the differential magnetoelectric coefficient by changing the direction of the bias magnetic field. (a)** Periodic modulation of magnetization (green) induced by an electric field (red) linearly varying between  $\pm 16.6$  kV/cm, for  $T=55$ K and  $\mu_0 H = -3.345$  T. These data differ from those shown in Fig 4(b) only by the direction of the applied magnetic field. Note the change of the sign of  $dM/dE$ . **(b)** Electric field dependence of magnetization for two opposite bias magnetic fields,  $+3.345$  T, and  $-3.345$  T. All the measurements are along the  $c$  axis.
